# Supplementary material for: Characteristics of Non-Emergent Visits in Emergency Departments: Profiles and Longitudinal Pattern Changes in Taiwan, 2000–2010
Source: PubMed Central journal article supplement (PMC6603954; doi:10.3390/ijerph16111999), 2019-06-05
Supplement: ijerph-16-01999-s001.pdf [file ijerph-16-01999-s001.pdf]

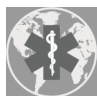

Supplementary Material

# Characteristics of Non-Emergent Visits in Emergency Departments: Profiles and Longitudinal Pattern Changes in Taiwan, 2000–2010

Liang-Chung Huang, Wu-Fu Chung, Shih-Wei Liu, Jau-Ching Wu, Li-Fu Chen and Yu-Chun Chen

**Table S1.** Average marginal effect (AME) by factors for non-emergent ED visits from three representative study cohorts (LHID2000, LHID2005, LHID2010) in Taiwan. ( $n = 1,000,000$  for each cohort, total ED visits,  $n = 475,862$ ).

|                                       | Average marginal effect (AME) <sup>1</sup> |                |         |                   |
|---------------------------------------|--------------------------------------------|----------------|---------|-------------------|
|                                       | AME                                        | (95 % C.I.)    | P-value | Sig. <sup>2</sup> |
| <b><u>Systematic-level factor</u></b> |                                            |                |         |                   |
| 2000                                  | -2.72                                      | (-3.09--2.35)  | <0.001  | ***               |
| 2005                                  |                                            | -base level-   |         |                   |
| 2010                                  | 3.72                                       | (3.38-4.05)    | <0.001  | ***               |
| <b><u>Personal-level factors</u></b>  |                                            |                |         |                   |
| <b><u>Demographic factor</u></b>      |                                            |                |         |                   |
| Gender                                |                                            |                |         |                   |
| Female                                |                                            | -base level-   |         |                   |
| Male                                  | -5.89                                      | (-6.18--5.60)  | <0.001  |                   |
| Age group                             |                                            |                |         |                   |
| 0-19                                  |                                            | -base level-   |         |                   |
| 20-39                                 | -3.55                                      | (-4.07--3.04)  | <0.001  | ***               |
| 40-59                                 | -4.69                                      | (-5.23--4.16)  | <0.001  | ***               |
| 60-79                                 | -4.43                                      | (-4.96--3.91)  | <0.001  | ***               |
| 80-                                   | -7.48                                      | (-8.18--6.78)  | <0.001  | ***               |
| <b><u>Socio-economic factors</u></b>  |                                            |                |         |                   |
| Income (NTD)                          |                                            |                |         |                   |
| Dependent                             |                                            | -base level-   |         |                   |
| 1-19999                               | -1.62                                      | (-2.05--1.19)  | <0.001  | ***               |
| 20000-39999                           | -0.48                                      | (-0.97-0.01)   | 0.057   |                   |
| 40000-                                | 1.13                                       | (0.45-1.80)    | 0.001   | **                |
| Geographical Residence                |                                            |                |         |                   |
| Northern area                         |                                            | -base level-   |         |                   |
| Eastern area                          | -2.65                                      | (-3.47- -1.83) | <0.001  | ***               |
| Middle area                           | 3.95                                       | (3.53-4.36)    | <0.001  | ***               |
| Southern area                         | 2.66                                       | (2.31-3.01)    | <0.001  | ***               |
| Urbanization of living area           |                                            |                |         |                   |

|                     |                     |        |     |
|---------------------|---------------------|--------|-----|
| Most urbanization   | 0.03 (-0.35-0.41)   | 0.871  |     |
| More urbanization   | -base level-        |        |     |
| Middle urbanization | -0.61 (-1.04--0.19) | 0.005  | **  |
| Less urbanization   | -0.75 (-1.21--0.29) | 0.001  | **  |
| Least urbanization  | -2.41 (-2.94--1.87) | <0.001 | *** |

### **Past health utilization in last year**

#### Any hospitalization

|              |                     |        |     |
|--------------|---------------------|--------|-----|
| None         | -base level-        |        |     |
| One time     | -1.97 (-2.40--1.54) | <0.001 | *** |
| >= two times | -4.39 (-4.95--3.83) | <0.001 | *** |

#### No. of ED visits

|                  |                     |        |     |
|------------------|---------------------|--------|-----|
| None             | -base level-        |        |     |
| Low (1-2 times)  | -0.96 (-1.28--0.63) | <0.001 | *** |
| High (>=3 times) | -2.45 (-2.90--2.01) | <0.001 | *** |

#### No. of outpatient visits

|                      |                  |        |     |
|----------------------|------------------|--------|-----|
| Low (0-11 times)     | -base level-     |        |     |
| Middle (12-26 times) | 0.39 (0.04-0.74) | 0.03   | *   |
| High (>= 27 times)   | 0.91 (0.51-1.32) | <0.001 | *** |

#### No. of TCM<sup>3</sup> outpatient visits

|                   |                  |        |     |
|-------------------|------------------|--------|-----|
| None              | -base level-     |        |     |
| Low (1-2 times)   | 0.89 (0.49-1.30) | <0.001 | *** |
| High (>= 3 times) | 1.23 (0.84-1.63) | <0.001 | *** |

### **ED visit-level factors**

#### Hospital accreditation level

|                           |                     |        |     |
|---------------------------|---------------------|--------|-----|
| Medical centers           | -3.18 (-3.52--2.84) | <0.001 | *** |
| Metropolitan hospitals    | -base level-        |        |     |
| Local community hospitals | 0.31 (-0.04-0.67)   | 0.085  |     |

#### Season

|                  |                  |        |     |
|------------------|------------------|--------|-----|
| Spring (Mar-May) | 0.46 (0.07-0.85) | 0.02   | *   |
| Summer (Jun-Aug) | 3.06 (2.67-3.45) | <0.001 | *** |
| Fall (Sep-Nov)   | 1.11 (0.71-1.51) | <0.001 | *** |
| Winter (Dec-Feb) | -base level-     |        |     |

#### Holiday

|     |                   |       |  |
|-----|-------------------|-------|--|
| No  | -base level-      |       |  |
| Yes | 0.54 (-0.01-1.10) | 0.056 |  |

#### Day of the Week

|           |                   |        |     |
|-----------|-------------------|--------|-----|
| Sunday    | 2.13 (1.42-2.85)  | <0.001 | *** |
| Monday    | 1.09 (0.54-1.64)  | <0.001 | *** |
| Tuesday   | 0.93 (0.37-1.49)  | 0.001  | **  |
| Wednesday | 0.44 (-0.13-1.00) | 0.129  |     |
| Thursday  | -base level-      |        |     |
| Friday    | 0.49 (-0.08-1.05) | 0.091  |     |

|              |                   |        |     |
|--------------|-------------------|--------|-----|
| Saturday     | 0.53 (-0.16-1.23) | 0.131  |     |
| Cost-sharing |                   |        |     |
| Yes          | -base level-      |        |     |
| Waived       | 3.15 (2.74-3.56)  | <0.001 | *** |

<sup>1</sup> AME were calculated using a logistic model adjusted for listed factors in addition to Charlson's index. The most frequent level of each factor was used as the base value. <sup>2</sup> Significance level: \*: P<0.05; \*\*: P<0.01; \*\*\*: P<0.001. <sup>3</sup> TCM: Traditional Chinese Medicine was considered a mainstream visit in addition to outpatient clinics and covered in Taiwan's insurance scheme.

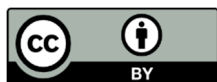

© 2019 by the authors. Submitted for possible open access publication under the terms and conditions of the Creative Commons Attribution (CC BY) license (<http://creativecommons.org/licenses/by/4.0/>).
